# Supplementary material for: Hepatoprotective potential of Malvaviscus arboreus against carbon tetrachloride-induced liver injury in rats
Source: PubMed Central journal article supplement (PMC6107176; doi:10.1371/journal.pone.0202362), 2018-08-23
Supplement: pone.0202362.s025.pdf [file pone.0202362.s025.pdf]

**S1 Table. Effect of the total extract and various fractions of *M. arboreus* on different biochemical parameters in CCl<sub>4</sub>-intoxicated rats.**

| Test sample/Standard                              | ALT<br>(IU/L)                   | AST<br>(IU/L)                   | ALP<br>(IU/L)                   | TB<br>(mg/dL)                | MDA<br>(n mole/mg)            | TAC<br>(n mole/mg)            |
|---------------------------------------------------|---------------------------------|---------------------------------|---------------------------------|------------------------------|-------------------------------|-------------------------------|
| Group 1 (Normal control)                          | 49.33 ±<br>4.10                 | 98.00 ±<br>6.25                 | 146.70 ±<br>3.48                | 0.43 ±<br>0.06               | 4.53 ±<br>0.35                | 1.90 ±<br>0.20                |
| Group 2 (CCl <sub>4</sub> )                       | 209.70 ±<br>2.60 <sup>***</sup> | 246.00 ±<br>19.05 <sup>**</sup> | 300.70 ±<br>3.76 <sup>***</sup> | 2.03 ±<br>0.18 <sup>**</sup> | 9.05 ±<br>0.08 <sup>***</sup> | 0.91 ±<br>0.01 <sup>**</sup>  |
| Group 3 (Silymarine + CCl <sub>4</sub> )          | 96.00 ±<br>9.81 <sup>***</sup>  | 136.70 ±<br>7.80 <sup>**</sup>  | 190.70 ±<br>7.80 <sup>***</sup> | 0.67 ±<br>0.03 <sup>**</sup> | 5.20 ±<br>0.17 <sup>***</sup> | 1.61 ±<br>0.02 <sup>***</sup> |
| Group 4 (Pet. ether fraction + CCl <sub>4</sub> ) | 206.00 ±<br>3.47                | 213.00 ±<br>8.09                | 277.00 ±<br>15.60 <sup>**</sup> | 1.54 ±<br>0.06               | 8.15 ±<br>0.14 <sup>**</sup>  | 1.10 ±<br>0.04 <sup>*</sup>   |
| Group 5 (DCM fraction + CCl <sub>4</sub> )        | 96.67 ±<br>7.22 <sup>***</sup>  | 136.00 ±<br>1.16 <sup>**</sup>  | 204.00 ±<br>15.01 <sup>**</sup> | 0.90 ±<br>0.04 <sup>**</sup> | 6.04 ±<br>0.08 <sup>***</sup> | 1.65 ±<br>0.02 <sup>***</sup> |
| Group 6 (EtOAc fraction + CCl <sub>4</sub> )      | 87.67 ±<br>6.41 <sup>***</sup>  | 139.70 ±<br>4.33 <sup>**</sup>  | 185.00 ±<br>16.17 <sup>**</sup> | 0.68 ±<br>0.05 <sup>**</sup> | 4.73 ±<br>0.12 <sup>***</sup> | 1.49 ±<br>0.02 <sup>***</sup> |
| Group 7 (Aqueous fraction + CCl <sub>4</sub> )    | 145.70 ±<br>4.91 <sup>**</sup>  | 163.70 ±<br>2.60 <sup>*</sup>   | 222.70 ±<br>4.91 <sup>***</sup> | 1.16 ±<br>0.02 <sup>**</sup> | 7.04 ±<br>0.12 <sup>***</sup> | 1.43 ±<br>0.03 <sup>***</sup> |
| Group 8 (Total extract + CCl <sub>4</sub> )       | 172.00 ±<br>9.81 <sup>*</sup>   | 186.00 ±<br>6.93 <sup>*</sup>   | 260.70 ±<br>3.76 <sup>**</sup>  | 1.29 ±<br>0.02 <sup>*</sup>  | 7.39 ±<br>0.30 <sup>**</sup>  | 1.33 ±<br>0.08 <sup>**</sup>  |

Values are mean ± S.E.M (*n* = 6)

\* Statistically significant differences (*p* < 0.05, compared with the CCl<sub>4</sub>-treated group).

\*\* Statistically significant differences (*p* < 0.01, compared with the CCl<sub>4</sub>-treated group).

\*\*\* Statistically significant differences (*p* < 0.001, compared with the CCl<sub>4</sub>-treated group).
